# Supplementary material for: Electron transfer reactions between copper(ii) porphyrin complexes and various oxidizing reagents in acetonitrileElectronic supplementary information (ESI) available: Figures reporting the UV-visible absorption spectra of [Cu(OEP)] and the product of the reaction of [Cu(OEP)] with Cu(ii) triflate in acetonitrile, the dependence of the absorbance on the ratio of the total concentrations of Cu(ii) ion and [Cu(OEP)] for the reaction of [Cu(OEP)] and Cu(ii) triflate, and the dependence of the pseudo-first-order rate constant of the reaction of [Fe(phen)3]3+ with [Ni(tacn)2]2+ on the concentration of the Ni(ii) complex. Tables of the second-order rate constant of the reaction of [Fe(phen)3]3+ with [Ni(tacn)2]2+ and the electron transfer properties of the complexes used in the present study. See http://www.rsc.org/suppdata/dt/b4/b403760j/
Source: Royal Society of Chemistry journal article supplement (doi:10.1039/b403760j), 2004-01-01
Supplement: b403760j.pdf [file b403760j.pdf]

# Supplementary Information

## **Electron Transfer Reactions between Copper(II) Porphyrin Complexes and Various Oxidizing Reagents in Acetonitrile**

Masahiko Inamo,\* Hideto Kumagai, Ushio Harada, Sumitaka Itoh,  
Satoshi Iwatsuki, Koji Ishihara, and Hideo D. Takagi

*Contribution from the Department of Chemistry, Aichi University of Education, Kariya  
448-8542, Japan, Department of Chemistry, Graduate School of Science, Nagoya  
University, Nagoya 464-8602, Japan, and Department of Chemistry, Waseda University,  
Tokyo 169-8555, Japan.*

\* To whom correspondence should be addressed. E-mail: minamo@aecc.aichi-edu.ac.jp

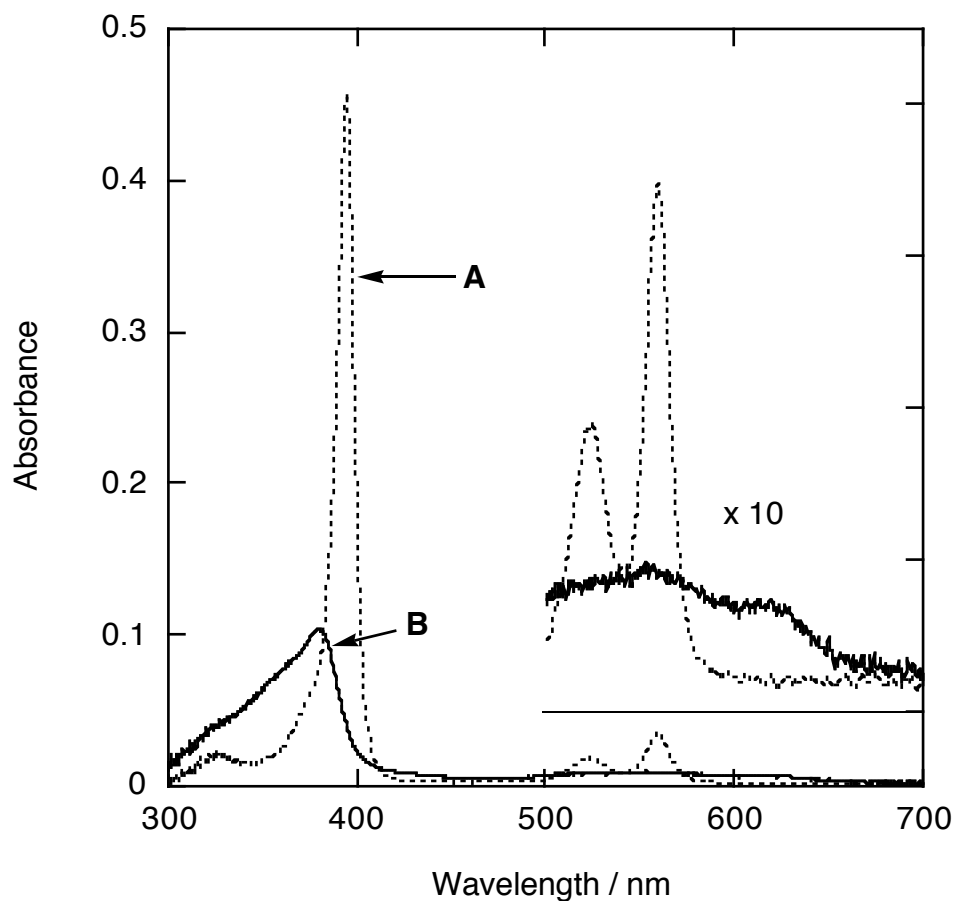

**Figure S1.** UV-visible absorption spectra of [Cu(OEP)] (**A**) and the product of the reaction with Cu(II) triflate (**B**) in acetonitrile at  $T = 25.0^{\circ}\text{C}$ .  $C_{\text{Cu-OEP}} = 1.26 \times 10^{-6} \text{ M}$ . The absorbance caused by the excess amount of the Cu(II) ion was subtracted from the original spectrum for the latter case.

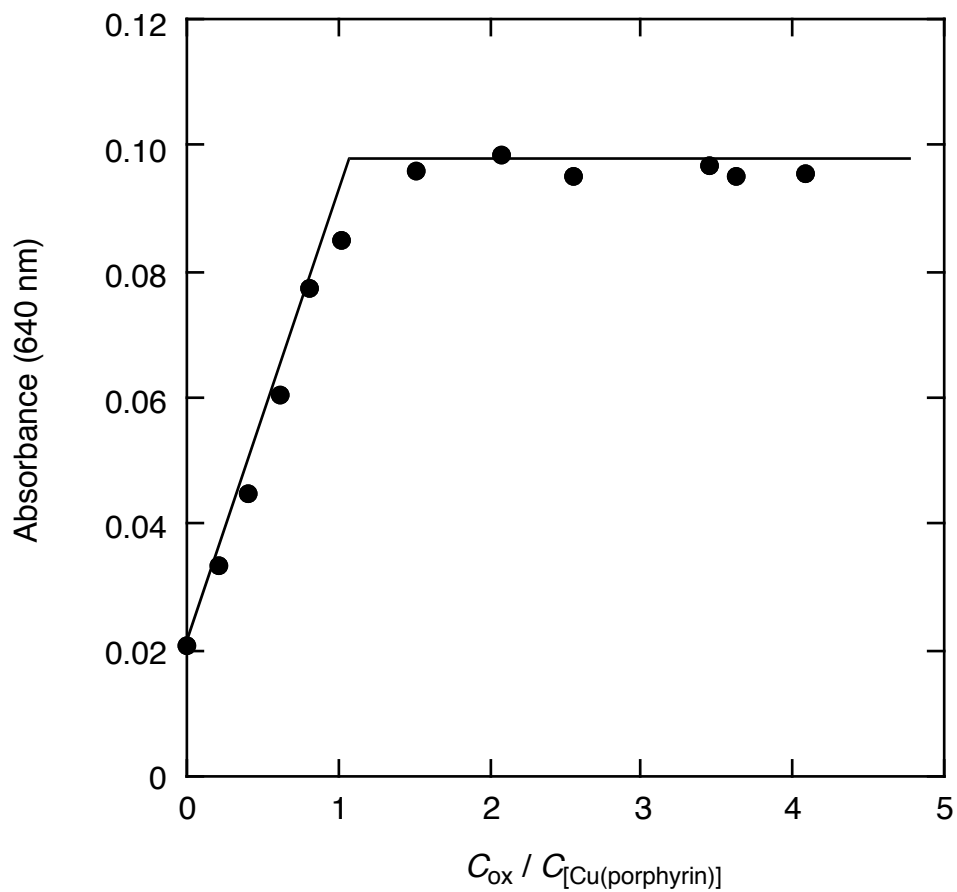

**Figure S2.** Dependence of the absorbance on the ratio of the total concentrations of Cu(II) ion ( $C_{\text{ox}}$ ) and [Cu(OEP)] ( $C_{[\text{Cu}(\text{porphyrin})]}$ ) for the reaction of [Cu(OEP)] and Cu(II) triflate at  $T = 25.0$  °C. Total concentration of the porphyrin complex is  $3.23 \times 10^{-5}$  M. The mixture of acetonitrile and dichloromethane (1:1 v/v) was used as a solvent instead of pure acetonitrile for the sake of higher solubility of the porphyrin complex.

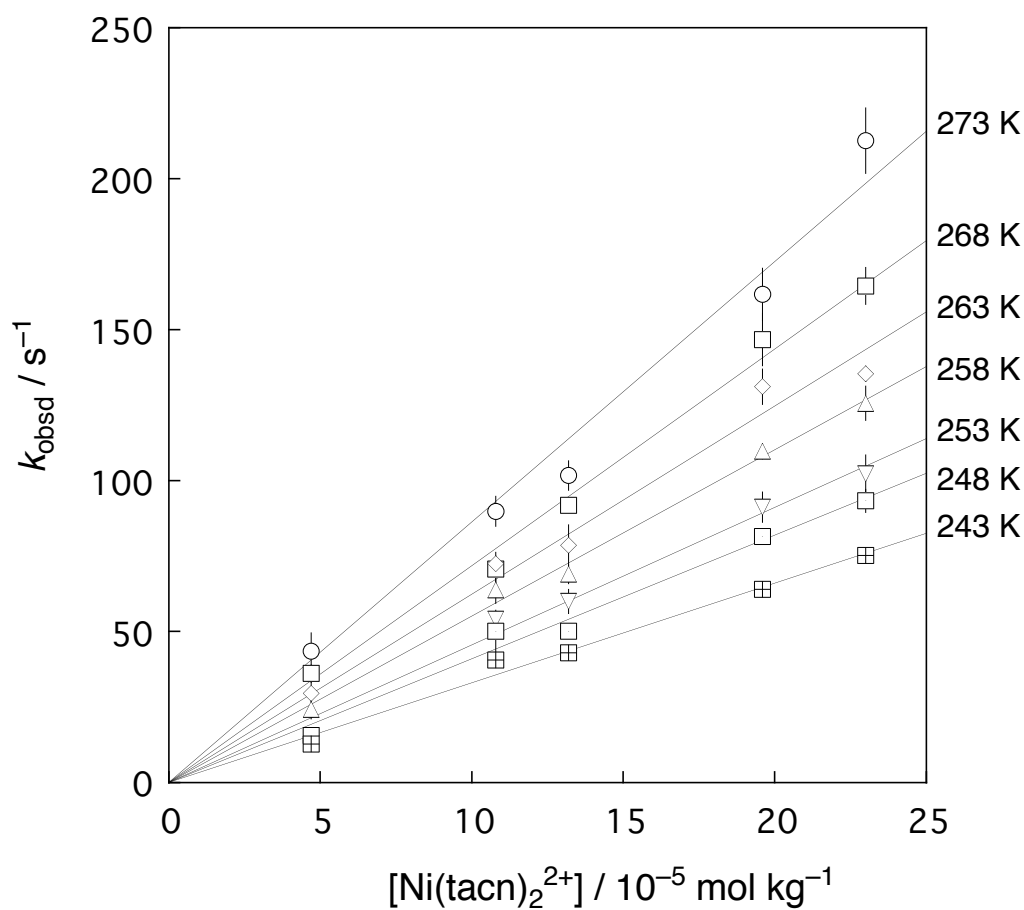

**Figure S3.** Dependence of the pseudo-first-order rate constant  $k_{\text{obsd}}$  of the reaction of  $[\text{Fe}(\text{phen})_3]^{3+}$  with  $[\text{Ni}(\text{tacn})_2]^{2+}$  on the concentration of the Ni(II) complex in acetonitrile. The concentration of the Fe(III) complex is  $(4.43 \sim 15.8) \times 10^{-6} \text{ mol kg}^{-1}$ .  $I = 0.1 \text{ mol kg}^{-1}$  (TBAP).

**Table S1.** Second-order rate constant  $k_{12}$  for the oxidation reaction of  $[\text{Ni}(\text{tacn})_2]^{2+}$  by  $[\text{Fe}(\text{phen})_3]^{3+}$  in acetonitrile solution.<sup>a</sup>

| $T / \text{K}^b$ | $k_{12} / 10^5 \text{ mol}^{-1} \text{ kg s}^{-1}$ |
|------------------|----------------------------------------------------|
| 243              | $3.30 \pm 0.04$                                    |
| 248              | $4.09 \pm 0.17$                                    |
| 253              | $4.58 \pm 0.07$                                    |
| 258              | $5.53 \pm 0.06$                                    |
| 263              | $6.25 \pm 0.10$                                    |
| 268              | $7.13 \pm 0.09$                                    |
| 273              | $8.72 \pm 0.15$                                    |
| 298              | $16^c$                                             |

<sup>a</sup>  $[\text{Fe}(\text{phen})_3]^{3+} = (4.43 \sim 15.8) \times 10^{-6} \text{ mol kg}^{-1}$ ,  $[\text{Ni}(\text{tacn})_2]^{2+} = (4.7 \sim 23.0) \times 10^{-5} \text{ mol kg}^{-1}$ .  $I = 0.1 \text{ mol kg}^{-1}$  (tetra-*n*-butylammonium perchlorate),  $[\text{CF}_3\text{SO}_3\text{H}] = 1 \text{ mmol kg}^{-1}$ . <sup>b</sup> The temperature of all samples was held constant within  $\pm 1 \text{ K}$ . <sup>c</sup> Rate constant at  $T = 298 \text{ K}$  was calculated using the kinetic parameters ( $\Delta H^\ddagger = 15.0 \pm 0.8 \text{ kJ mol}^{-1}$ ,  $\Delta S^\ddagger = -75.9 \pm 2.8 \text{ J mol}^{-1} \text{ K}^{-1}$ ) determined from the rate constants in the temperature range from 243 K to 273 K. The value of  $k_{12}(298 \text{ K})$  in the molarity unit is  $2.0 \times 10^6 \text{ M}^{-1} \text{ s}^{-1}$ .

**Table S2.** Electron Transfer Properties of the Complexes Used in the Present Study: Equilibrium Constant of the Electron Transfer Reaction ( $K$ ), Radii of the Complexes ( $a_1$ ,  $a_2$ ), So-called Work Terms in the Marcus Theory ( $w_{11}$ ,  $w_{22}$ ,  $w_{12}$ ,  $w_{21}$ , and  $W_{12}$ ), Rate Constant for the Self-Exchange Reaction ( $k_{11}$  or  $k_{22}$ ), and the Factor  $f$ .

|                                            |                                                   |                                        |                                       |                                     |                                     |
|--------------------------------------------|---------------------------------------------------|----------------------------------------|---------------------------------------|-------------------------------------|-------------------------------------|
| Oxidant                                    | [Fe( <i>o</i> -phen) <sub>3</sub> ] <sup>3+</sup> | Cu <sup>2+</sup>                       | Cu <sup>2+</sup>                      | Cu <sup>2+</sup>                    | Cu <sup>2+</sup>                    |
| Reductant                                  | [Ni(tacn) <sub>2</sub> ] <sup>2+</sup>            | [Ni(tacn) <sub>2</sub> ] <sup>2+</sup> | [Ru(hfac) <sub>3</sub> ] <sup>-</sup> | [Cu(TPP)]                           | [Cu(OEP)]                           |
| $K$                                        | 9.9 x 10                                          | 4.9 x 10                               | 9.7 x 10 <sup>4</sup>                 | 33                                  | 1600                                |
| $a_1$ / pm                                 | 680                                               | 340                                    | 340                                   | 340                                 | 340                                 |
| $a_2$ / pm                                 | 380                                               | 380                                    | 500                                   | 1800                                | 1500                                |
| $w_{11}$ / kJ mol <sup>-1</sup>            | 5.5                                               | 5.5                                    | 5.5                                   | 5.5                                 | 5.5                                 |
| $w_{22}$ / kJ mol <sup>-1</sup>            | 13.9                                              | 13.9                                   | 0                                     | 0                                   | 0                                   |
| $w_{12}$ / kJ mol <sup>-1</sup>            | 8.2                                               | 10.1                                   | -4.0                                  | 0                                   | 0                                   |
| $w_{21}$ / kJ mol <sup>-1</sup>            | 8.2                                               | 7.5                                    | 0                                     | 0.4                                 | 0.5                                 |
| $W_{12}$                                   | 1.80                                              | 1.43                                   | 6.72                                  | 2.78                                | 2.71                                |
| $k_{12}$ / M <sup>-1</sup> s <sup>-1</sup> | 2.0 x 10 <sup>6</sup>                             | 3.50                                   | 1.60 x 10 <sup>4</sup>                | 5.80 x 10 <sup>3</sup>              | 1.98 x 10 <sup>5</sup>              |
| $k_{11}$ / M <sup>-1</sup> s <sup>-1</sup> | 1.4 x 10 <sup>7</sup>                             | 1.2 x 10 <sup>-4</sup> <sup>a</sup>    | 1.5 x 10 <sup>-5</sup> <sup>a</sup>   | 4.2 x 10 <sup>-5</sup> <sup>b</sup> | 4.2 x 10 <sup>-5</sup> <sup>b</sup> |
| $k_{22}$ / M <sup>-1</sup> s <sup>-1</sup> | 1.2 x 10 <sup>3</sup> <sup>a</sup>                | 1.2 x 10 <sup>3</sup>                  | 7.0 x 10 <sup>6</sup>                 | 3.4 x 10 <sup>9</sup> <sup>a</sup>  | 1.2 x 10 <sup>11</sup> <sup>a</sup> |
| $f$                                        | 0.7613                                            | 0.8744                                 | 0.5727                                | 0.9268                              | 0.6774                              |

<sup>a</sup> Value determined from eq 7. <sup>b</sup> The averaged value of 1.2 x 10<sup>-4</sup> M<sup>-1</sup> s<sup>-1</sup> and 1.5 x 10<sup>-5</sup> M<sup>-1</sup> s<sup>-1</sup>.
